1 **Dengue Disease Dynamics are Modulated by the Combined Influence of Precipitation and Landscapes: A**  
2 **Machine Learning-based Approach**

3

4 **AUTHORS**

5 Micanaldo Ernesto Francisco<sup>1,2</sup>, Thaddeus M. Carvajal<sup>1,2,3,4</sup>, Masahiro Ryo<sup>5,6</sup>, Kei Nukazawa<sup>7</sup>, Divina M.

6 Amalin<sup>3,4</sup>, and Kozo Watanabe<sup>1,2,3,4a</sup>

7

8 <sup>1</sup> Center for Marine Environmental Studies (CMES), Ehime University, Matsuyama, Japan

9 <sup>2</sup> Graduate School of Science and Engineering, Ehime University, Matsuyama, Japan

10 <sup>3</sup> Biology Department, De La Salle University, Taft Ave Manila, Philippines

11 <sup>4</sup> Biological Control Research Unit, Center for Natural Science and Environmental Research, De La Salle

12 University, Taft Ave Manila, Philippines

13 <sup>5</sup> Institute of Biology, Freie Universität Berlin, Germany

14 <sup>6</sup> Berlin-Brandenburg Institute of Advanced Biodiversity Research, Berlin, Germany

15 <sup>7</sup> Department of Civil and Environmental Engineering, University of Miyazaki, Miyazaki, Japan

16

17 <sup>a</sup> Corresponding author: [watanabe.kozo.mj@ehime-u.ac.jp](mailto:watanabe.kozo.mj@ehime-u.ac.jp)

18

## 19 ABSTRACT

20 Background: Dengue is an endemic vector-borne disease influenced by environmental factors such as  
21 landscape and climate. Previous studies separately assessed the effects of landscape and climate factors  
22 on mosquito occurrence and dengue incidence. However, both factors interact in time and space to  
23 affect mosquito development and dengue disease transmission. For example, eggs laid in a suitable  
24 environment can hatch after being submerged in rain or flood water.

25 Objectives: This study aimed to investigate the combined influences of landscape and climate factors on  
26 mosquito occurrence and dengue incidence.

27 Methods: Entomological, epidemiological, and landscape data from the rainy season (July-December)  
28 were obtained from respective government agencies in Metro Manila, Philippines, from 2012 to 2014.  
29 Temperature, precipitation, and vegetation data were obtained through remote sensing. A random forest  
30 algorithm was used to select the landscape and climate variables. Afterwards, using the identified key  
31 variables, a model-based (MOB) recursive partitioning was implemented to test the combinatory  
32 influences of landscape and climate factors on the ovitrap index and dengue incidence.

33 Results: The MOB recursive partitioning for the ovitrap index indicated that mosquito occurrence was  
34 higher in high residential density areas, where industrial areas also exist and are well connected with  
35 roads. Precipitation was another key covariate modulating the effects of landscape factors, possibly by  
36 expanding breeding sites and activating mosquito reproduction. Moreover, the MOB recursive  
37 partitioning indicated that precipitation was the main predictor of dengue incidence, with a stronger  
38 effect in high residential density and commercial areas.

39 Discussion: Precipitation with floods has epidemiologically important implications by damaging shelters  
40 and causing population displacement, thus increasing exposure to dengue vectors. Our findings suggest

41 that the intensification of vector control during the rainy season can be prioritized in residential and  
42 commercial areas to better control dengue disease dynamics.

43

## 44 INTRODUCTION

45 Dengue is an endemic vector-borne disease influenced by environmental factors such as climate  
46 and landscape. Dengue-endemic countries such as the Philippines consider this arboviral disease an  
47 economic and health burden (Buczak, et al. 2014). Environmental factors, particularly climate and  
48 landscape, play a significant role in regulating the temporal variation and spatial distribution of dengue  
49 and the vectors *Aedes aegypti* and *Ae. albopictus* (Hayden, et al. 2010). These factors can mediate  
50 human-mosquito interactions by expanding the vector's habitat and increasing its abundance, thus  
51 advancing dengue disease transmission (Thongsripong, et al. 2013).

52 Previous studies demonstrated that climate factors such as precipitation and temperature  
53 significantly affect both mosquito abundance (Barrera, Amador and MacKay 2011, Naish, et al. 2014) and  
54 dengue incidence (Phanitchat, et al. 2019, Carvajal, Viacrusis, et al. 2018). For example, the high  
55 availability of breeding sites for mosquitoes during the rainy season in Southeast Asian countries (e.g.,  
56 Philippines, Singapore, Thailand, and Indonesia) contributes to the increased number of annual dengue  
57 cases (Su 2008, Hashizume, et al. 2012). Many studies have reported that the increasing number of cases  
58 is associated with the high number of available mosquito breeding sites that can hold or contain  
59 rainwater, thereby facilitating high mosquito abundance (Seidahmed, et al. 2018, Arcari, Tapper and  
60 Pfueller 2007). Additionally, high temperatures are responsible for extending adult mosquito longevity,  
61 accelerating virus replication, and enhancing the mosquito biting rate (Kilpatrick, et al. 2008, Chan and  
62 Johansson 2012).

63           Recent studies have shown that different land use (LU) types (residential, industrial, and  
64 agricultural areas) may have different impacts on dengue incidence (Kesetyaningsih, et al. 2018, Sheela,  
65 et al. 2017, Sarfraz, et al. 2012, Vanwambeke, Lambin, et al. 2007, Cheong, Leitão and Lakes 2014) given  
66 the uneven spatial distribution of vectors in these terrestrial habitats (Piovezan, et al. 2019). Areas with  
67 human settlements contribute to a high incidence of dengue (Cheong, Leitão and Lakes 2014, Sarfraz, et  
68 al. 2012) due to the high availability of man-made water-holding containers that serve as breeding sites  
69 (Ngugi, et al. 2017) and humans as a host preference for blood meals (Higa 2011).

70           Most previous studies investigated the effects of either dynamic climate factors (Carvajal,  
71 Viacrusis, et al. 2018, Zheng, et al. 2019, Arcari, Tapper and Pfueller 2007, Tovar-Zamora, et al. 2019,  
72 Bavia, et al. 2020) or static spatial distributions of landscape attributes (Seidahmed, et al. 2018,  
73 Vanwambeke, Lambin, et al. 2007, Vanwambeke, N.Bennett and Kapan 2011, Sarfraz, et al. 2012) on the  
74 temporal variations or spatial distributions of mosquito occurrence and dengue incidence. However,  
75 landscape and climate conditions can change concurrently in time and space, and their spatiotemporal  
76 interrelation may play a decisive role in determining the positive or negative effects on mosquitoes and  
77 dengue, such as interference during flood events. In small areas where rainfall is equally distributed,  
78 rainwaters flow from highlands to lowlands due to gravity, and patterns of water flow and retention can  
79 greatly differ in LU type due to surface roughness texture and permeability. Comparative studies reported  
80 high mosquito densities in flooded lowlands compared with non-flooded highlands (Nasir, et al. 2017,  
81 Rydzanicz, Kącki and Jawień 2011). One study reported that the high mosquito abundance in lowlands  
82 was influenced by floods that reach mosquito eggs that were previously laid in the environment  
83 (Hashizume, et al. 2012). Another study demonstrated that during the dry season, mosquito abundance  
84 was high in residential areas given the availability of permanent water-holding containers that served as  
85 breeding sites (Little, Bajwa and Shaman 2017); in the wet season, mosquito reproduction expanded to  
86 other non-residential areas. These studies found an uneven effect of precipitation on mosquito

87 abundance due to different ecological responses in different local landscapes (Nasir, et al. 2017,  
88 Rydzanicz, Kącki and Jawień 2011, Little, Bajwa and Shaman 2017). The characteristics of a local area's  
89 landscape can also influence its microclimate (Chang, Li and Chang 2007, Lin, et al. 2018, Thani,  
90 Mohamad and Abdullah 2017, Shashua-Bar, Pearlmutter and Erell 2011), potentially thus affecting the  
91 ecology of the mosquito and dengue transmission. For example, areas with a high percentage of  
92 impervious surfaces (e.g., paved roads, built-up areas) with less vegetation coverage can absorb high  
93 amounts of solar radiation and produce more heat compared to areas with less impervious surfaces and  
94 extensive vegetation coverage (Koch-Nielsen 1999). Therefore, the combinatory influence of landscape  
95 and climate factors on mosquito and dengue incidence must be quantitatively assessed (Sallam, et al.  
96 2017). No studies have yet attempted to assess the combined influence of climate and landscape features  
97 on dengue disease dynamics.

98         Previous studies that utilized environmental factors to develop dengue epidemiology models  
99 faced challenges when jointly considering climate and landscape attributes, preventing us from better  
100 understanding dengue disease distribution. One such challenge is the availability of secondary datasets  
101 (Sarfraz, et al. 2012, Vanwambeke, Lambin, et al. 2007). Climate data such as temperature and  
102 precipitation are typically obtained from ground weather stations. However, using such data is limited by  
103 the limited number of ground weather stations. Therefore, remotely sensed climatic variable data have  
104 been utilized in epidemiological studies to address the lack of routinely collected data from ground  
105 meteorological stations (Kapwata and Gebreslasie 2016, German, et al. 2018). With the introduction of  
106 platforms that integrate remote sensing and cloud computation such as Google Earth Engine (GEE)  
107 (Gorelick, et al. 2017), it is possible to freely access and process many types of satellite-derived products  
108 with notable flexibility, even in large areas (DeVries, et al. 2020). However, many studies that utilize LU  
109 based on satellite images contain certain limitations. In this type of map, built-up areas are often treated  
110 as a single category (Vanwambeke, et al. 2006, Ibarra, et al. 2014, German, et al. 2018), preventing the

111 ability to further distinguish the subcategories of land utilization such as residential, commercial,  
112 industrial, etc. These different categories of LU have different ecological responses to mosquito and  
113 dengue dynamics (Thammapalo, et al. 2007); hence, detailed maps might amplify the chances to capture  
114 fine scale variations of mosquito habitats and dengue incidence. Although labor intensive, detailed LU  
115 maps produced by local governmental agencies based on field observations can help uncover patterns of  
116 dengue disease at a fine scale by capturing the different categories of land utilization in urban areas  
117 (Nazri, et al. 2011).

118 Another challenge is finding an appropriate method to model complex interactive mechanisms  
119 between multiple environmental factors (Little, Bajwa and Shaman 2017, Sarfraz, et al. 2012). In the  
120 recent decade, modeling techniques in machine learning methods such as random forests (RFs) (Breiman  
121 2001) have been adopted to analyze complex databases and handle anomalies found in datasets such as  
122 outliers and multi-collinearity among covariates. Data-intensive modeling has gained popularity in  
123 spatiotemporal ecological modeling at the landscape or larger scales to better explain ecological or  
124 epidemiological patterns by capturing nonlinear variable interactions (Ryo, Yoshimura and Iwasaki 2018,  
125 Ryo, Harvey, et al. 2017b, Ryo and Rilling 2017a). The results of this approach improved RF model  
126 accuracy (Leontjeva and Kuzovkin 2016) and better predictability of species' habitat distribution with the  
127 inclusion of maximum entropy (Stanton, et al. 2012).

128 This study aimed to examine the combinatory influence of landscape and climate features on  
129 mosquito occurrence and dengue incidence across Metropolitan Manila, the Philippines. We employed  
130 some advanced machine learning algorithms due to its growing utilization to explore the influence of  
131 landscape features or climate on dengue disease (Carvajal, Viacrusis, et al. 2018, Guo, et al. 2017, Ong, et  
132 al. 2017, Chen, et al. 2018, Baquero, Santana and Chiaravalloti-Neto 2018) and mosquito occurrence  
133 (Mwanga, et al. 2019, Jiménez, et al. 2019, Früh, et al. 2018, Zheng, et al. 2019). By selecting important  
134 environmental features for RFs, we further examined and described the optimal combination of

135 landscape and climate conditions that influence dengue disease and mosquito occurrence using model-  
136 based (MOB) recursive partitioning.

137

## 138 MATERIALS AND METHODS

### 139 Study area

140 Metropolitan Manila is the National Capital Region (NCR) of the Philippines, located at  
141 Southwestern Luzon (14°50'N Latitude, 121°E Longitude). With 100% urbanization (Asian Development  
142 Bank 2014), the NCR is the most densely populated area in the country (18,165.1 persons/km<sup>2</sup> spread  
143 over an administrative land area of 636 km<sup>2</sup>) (Asian Green City Index 2011). It comprises 16 cities and one  
144 municipality with a total population of 12,877,253 (Philippines Statistics Authority 2019). Each city or  
145 municipality is further subdivided into the smallest administrative division, a “Barangay,” commonly  
146 known as a village, with 1,706 total villages. A collection of villages can be merged into a “zone”  
147 depending on the city’s administrative boundaries.

148 The majority of the target area is covered by residential (54.07%), industrial (9.41%), and  
149 commercial (7.45%) areas. The territorial development of Metro Manila occurred through a gradual  
150 replacement of agricultural LU by industrial, commercial, and a massive increase in residential areas. The  
151 constant spatial and population growth has led to LU pressure and instigated substandard housing in  
152 areas with a high risk of flooding (Zoleta-Nantes 200).

153 The climate in Metro Manila is divided into two major seasons: the dry season (November to  
154 April) and the wet season (the rest of the year) (DOST 2014). The rainy season from June to September is  
155 characterized by strong monsoon rain and tropical storms (World Bank 2014). Heavy rain associated with  
156 a lack of drainage infrastructure leads to a high vulnerability for flooding (Zoleta-Nantes 200).

### 157 Data Sources and Processing

158           **Administrative boundaries**

159           The map of the administrative boundaries of Metropolitan Manila (Figure 1a) was obtained from  
160 the Philippine GIS Data clearinghouse ([www.philgis.org](http://www.philgis.org)). Metropolitan Manila includes 1,706 villages  
161 (barangays) with most within the City of Manila (n = 897; 53%). In this study, the villages of Manila,  
162 Caloocan, and Pasay were merged together into “zones” to facilitate consistency in village size because  
163 most villages are very small with an average area of 0.06 km. Additionally, 86% (n = 771) of the villages  
164 have a total area of <0.06 km<sup>2</sup>. The average total area of each village in Metropolitan Manila (excluding  
165 the City of Manila) is 0.41 km<sup>2</sup>. This study used the City of Manila, Caloocan, and Pasay’s designated zone  
166 names to merge villages. Overall, 464 villages or zones were subsequently analyzed in this study. The  
167 population statistics were obtained from the Philippine Statistics Authority agency ([www.psa.gov.ph](http://www.psa.gov.ph)).  
168 Since the Philippine population census is conducted every five years, we obtained the 2010 (Philippines  
169 Statistics Authority 2012) and 2015 (Philippines Statistics Authority 2019) census data and used the  
170 compounded population growth rate to calculate the population for the years 2012 and 2013. The sum of  
171 the projected population of the merged villages (Manila, Caloocan, and Pasay) was also calculated.

172           **Entomological surveillance**

173           In 2012, governmental institutions (Department of Science and Technology (DOST), Department  
174 of Education, Department of Health, Department of Interior, and local governments) implemented a  
175 nationwide surveillance program that installed DOST Ovicidal/Larvicidal traps (OL-traps) to monitor  
176 *Aedes* mosquitoes to help control dengue transmission and reduce dengue cases (DOST n.d., DOST  
177 Mosquito Ovicidal/Larvicidal (OL) Trap for Dengue Prevention 2013). Surveillance programs in many  
178 countries have utilized ovitraps as a routine surveillance tool because they are relatively low-cost and  
179 reliable in attracting gravid *Aedes* females for oviposition (Silver 2007, Ritchie, et al. 2003). In Metro  
180 Manila, ovitraps were installed in public places such as schools, institutes, and other education facilities. A  
181 total of 719 georeferenced surveillance locations containing reported Ovitrap indices (OIs) were extracted



182 from the reporting website (<http://oltrap.pchrd.dost.gov.ph/>) (DOST n.d.) from July 2012 to December  
183 2014. Afterwards, each georeferenced surveillance location was matched with its corresponding village,  
184 with only 268 of the 464 villages containing mosquito surveillance location(s). We aggregated the OIs into  
185 a monthly index by dividing the cumulative OI by the total number of sampling locations. Given the low  
186 numbers and inconsistent reporting during the months of January to June, the study only included the  
187 aggregated monthly OI from July to December of 2012, 2013, and 2014 (Additional file 3).

## 188 **Epidemiological data**

189 The total number of weekly reported dengue cases from January 2012 to December 2014 for all  
190 464 villages was obtained from the National Epidemiology Center, Department of Health, Philippines. We  
191 calculated the monthly dengue incidence by dividing the total number of dengue cases each month by  
192 the total population of the village multiplied by a population factor of 10,000. The dengue incidence was  
193 transformed by adding 1 to all values and obtaining its natural logarithm [ $\log_e (n + 1)$ ].

## 194 **Climatic factors**

195 Remote sensing (RS) is a promising tool in epidemiological studies (German, et al. 2018, Misslin  
196 and Daudé 2017, Buczak, et al. 2014, Araujo, et al. 2015). This study used the Tropical Rainfall  
197 Measurement Mission (TRMM) product 3B43 to obtain the monthly average rainfall. This gridded quasi-  
198 global product consists of monthly average precipitation measured in hourly bases with 0.25° of spatial  
199 resolution (Huffman and Bolvin 2018). The Terra Moderate Resolution Image Spectroradiometer (MODIS)  
200 collected the average land surface temperature. The product MOD11A2 consists on the average  
201 temperature collected within an eight-day period for both daytime and nighttime temperatures with 1  
202 km spatial resolution (USGS n.d.). GEE (Gorelick, et al. 2017) was used to download the RS raster images,  
203 apply scaling factor (0.02), and convert temperature values from the default Kelvin (K) to degrees Celsius  
204 (°C). This product suffers from missing data, particularly during the rainy season (August-October), given

205 the high cloud cover and other atmospheric disturbances. To overcome this limitation, a Kriging  
206 interpolation method was applied to complete monthly temperature records for each village using ArcGIS  
207 software version 10.2 (ESRI, Redlands, CA). This method weights the surrounding measured values to  
208 derive a surface of predicted values for an unmeasured location (ESRI 2016). Since each village can be  
209 covered by multiple pixels of the raster images of precipitation and temperature, the mean value of all  
210 pixels within each village (spatial) was calculated per month (temporal) and used for further analyses.

211 A flood hazard map of Metro Manila was obtained from the LiDAR Portal for Archiving and  
212 Distribution (LiPAD) website (<https://lipad.dream.upd.edu.ph>) (LiPAD 2018). This flood map indicates the  
213 flood susceptibility level at a 10-m spatial resolution (NOAH 2015). There are three categories of flood  
214 susceptibility: (a) low (flood water height ranging from 0.1–0.5 m), b) moderate (0.5–1.5 m), and (c) high  
215 (above 1.5 m). Initially, the percentage of land covered by each flood risk category was calculated by  
216 village and multiplied by a weighing value from 1 (low) to 3 (high) according to the risk category. The  
217 average of these three values was calculated and utilized as the flood risk index per village. The degree of  
218 flood susceptibility was estimated based on a five-year period of heavy rain scenarios and thus is limited  
219 to spatial risk and does not consider the variation of risk throughout a year.

220

## 221 **Landscape factors**

222 The local LU map of Metropolitan Manila (2004) was obtained from the Philippine Geoportal  
223 website ([www.geoportal.gov.ph](http://www.geoportal.gov.ph)) managed by the Bureau of National Mapping and Resource Authority  
224 and the Metropolitan Manila Development Authority (NAMRIA n.d.). This map contains 30 LU types  
225 (agricultural, grass, forest, water bodies, open spaces, parks and recreation, education and cultural,  
226 health and welfare, religious and cemetery, military, governmental institutions, industrial, commercial,  
227 transport, residential areas of very low, low, medium, high, and very high density, and informal

228 settlements). The largest portion (54.07%) was covered by residential areas (very low, low, medium, high,  
229 and very high densities) with multi-story dwelling places (1–2, 3–4, 5, or more stories). This study only  
230 considered the house density categories (very low, low, medium, high, and very high) given the very small  
231 proportion of multi-story categories of more than three stories (0.01%–0.07%). Non-residential areas  
232 such as industrial, commercial, and public facilities comprised 37% of Metropolitan Manila. A small  
233 portion was covered by natural landscape aspects such as water bodies and forests (10%). The 2004 LU  
234 map had a dengue incidence time gap (2012–2014); thus, we updated the map to the period covered by  
235 our study so that all input parameters in the model had the same time range. This map was subjected to  
236 updates based on open street maps (OSM), processed and distributed by Geofabrik GmbH  
237 ([www.geofabrik.de](http://www.geofabrik.de)). The OSM data contained modifications that occurred before December 2016  
238 (Geofabrik GmbH 2019). Prior knowledge of the study area was used to manually inspect and validate the  
239 map modifications. LU variables included the percentage of land covered by each LU class (i.e., agriculture,  
240 water bodies, commercial, residential) per village (Figure 1b–d). The percentage of each LU class was  
241 calculated as follows. Firstly, we calculated the area of each LU class per village. Then, the percentage of  
242 each class was determine over the total area of the villages. All edits and calculations of LU areas per  
243 village was performed in ArcGIS software, version 10.2.

244 Road network density (RND) assesses the urbanization gradient (Suarez-Rubio and Krenn 2018),  
245 which influences mosquito abundance and dengue transmission (Bostan, et al. 2017). The road network  
246 map was obtained from the Philippine GIS Data Clearinghouse website (<http://philgis.org/>) and classifies  
247 roads as primary, secondary, tertiary, residential, and others (PhilGIS 2012). The RND for each category  
248 was calculated by dividing the total length of roads by the total village area. Since the RND of each  
249 category of primary, secondary, and tertiary roads was less than 0.001 m/m<sup>2</sup>, we merged them into a  
250 single category, “main roads” (Figure 1e). Terra MODIS Normalized Difference of Vegetation Index (NDVI)  
251 was derived from the product MOD13Q1 version 6. The NDVI consists of measures of the reflected

252 photosynthetic activity on vegetation and is generated every 16 days at 250-m spatial resolution (USGS  
253 n.d.). All images were downloaded through GEE and processed using ArcGIS to obtain their monthly  
254 averages per village.

### 255 **Cross-correlation analysis**

256 A cross-correlation analysis was conducted on the temporal variations of environmental factors  
257 (precipitation, temperature, and vegetation) on the OI and dengue incidence. The mean value of  
258 Metropolitan Manila area per month for each variable was utilized. We identified the best-lag based on  
259 the highest Pearson correlation coefficient that was generated and its statistical significance ( $p < 0.05$ ).  
260 These analyses were implemented in R software version 3.6.2 using “*ggpubr*” package version 0.2.4  
261 (Kassambara 2019). The best-lag timing for each variable was used for the latter analyses.

### 262 **Model development with variable selection**

263 RF is a bootstrap aggregation (bagging) ensemble method that generates a large number of  
264 independent bootstrapped trees from random small subsets of the dataset (Breiman 2001). RF is used to  
265 solve a variety of classification and regression problems due its ability to handle large numbers of  
266 predictor variables even in the presence of complex interactions (Garge, Bobashev and Eggleston 2013).  
267 Two regression models were implemented in this study. Dengue incidence was regressed with lagged  
268 climate factors, LU types, and OI, with 27 explanatory variables. Additionally, the OI was regressed with  
269 lagged climate factors and LU types, with 26 explanatory variables. RF models were estimated using the  
270 “*ranger*” package (Wright, Wager and Probst 2020) implemented in the R software version 3.6.2 (R Core  
271 Team 2017) with parameters set at  $n_{tree} = 500$  and  $m_{try} = 5$ .

272 To identify the most important predictors of dengue incidence and mosquito occurrence, we  
273 assessed variable importance (VI), which was measured as the mean decrease in MSE in the RF models. VI  
274 is calculated based on the number of times the explanatory variable is used for splitting, weighted by the

275 improvement to the model as a result of each split, averaged over all trees (Elith, Leathwick and T.Hastie  
276 2008). For the VI and respective p-values, we applied the permutation importance method, which  
277 computes an unbiased VI measure (Zeileis, Hothorn and Hornik 2008). Positive importance values with p-  
278 values less than 0.05 were selected for the subsequent MOB recursive partitioning analysis.

279 To investigate the interactions of the selected explanatory variables, we used MOB recursive  
280 partitioning to build a decision tree hierarchy by recursively partitioning the data into several groups  
281 using the variable that provides the best split per node (Zeileis, Hothorn and Hornik 2008). Recursive  
282 partitioning was implemented via two steps. First, we utilized all selected explanatory variables to build a  
283 decision tree to see the overall distributions of the OI and dengue incidence. From this step, we can also  
284 identify the main predictors of the OI and dengue incidence. In the second step, we explicitly specified  
285 the most important predictor found in the earlier step as the main explanatory variable in the model and  
286 then explored covariates that modulate the associations between the main predictors and the response  
287 variables. Herewith, we inferred how the OI and dengue incidence were modulated by the interaction  
288 between the main predictor and other variables. We used the Linear Model Tree (*lmtree*) interface  
289 implemented in “*partykit*” package (Hothorn and Zeileis 2015) in R Software (R Core Team 2017). For  
290 each of the generated intermediate nodes, regression coefficients and *p-values* were computed to inform  
291 the relevance of the splitting variable in a particular node. We set *p value* < 0.05 and maximum depth = 4  
292 as the stopping criteria so that only the most important variables and intermediate nodes that were  
293 statistically significant were used for modeling. These hyperparameters have been suggested to avoid  
294 model overfitting (Zeileis, Hothorn and Hornik 2008, Pirkle, et al. 2018), and simplification of tree  
295 structure was performing by only including the most relevant predictors (Kopf, Augustin and Strobl 2010).  
296 The *p-values* were *Bonferroni* corrected to control a false positive rate. The slope coefficients, R-squared,  
297 and p-values were obtained using the “*summary()*” function.

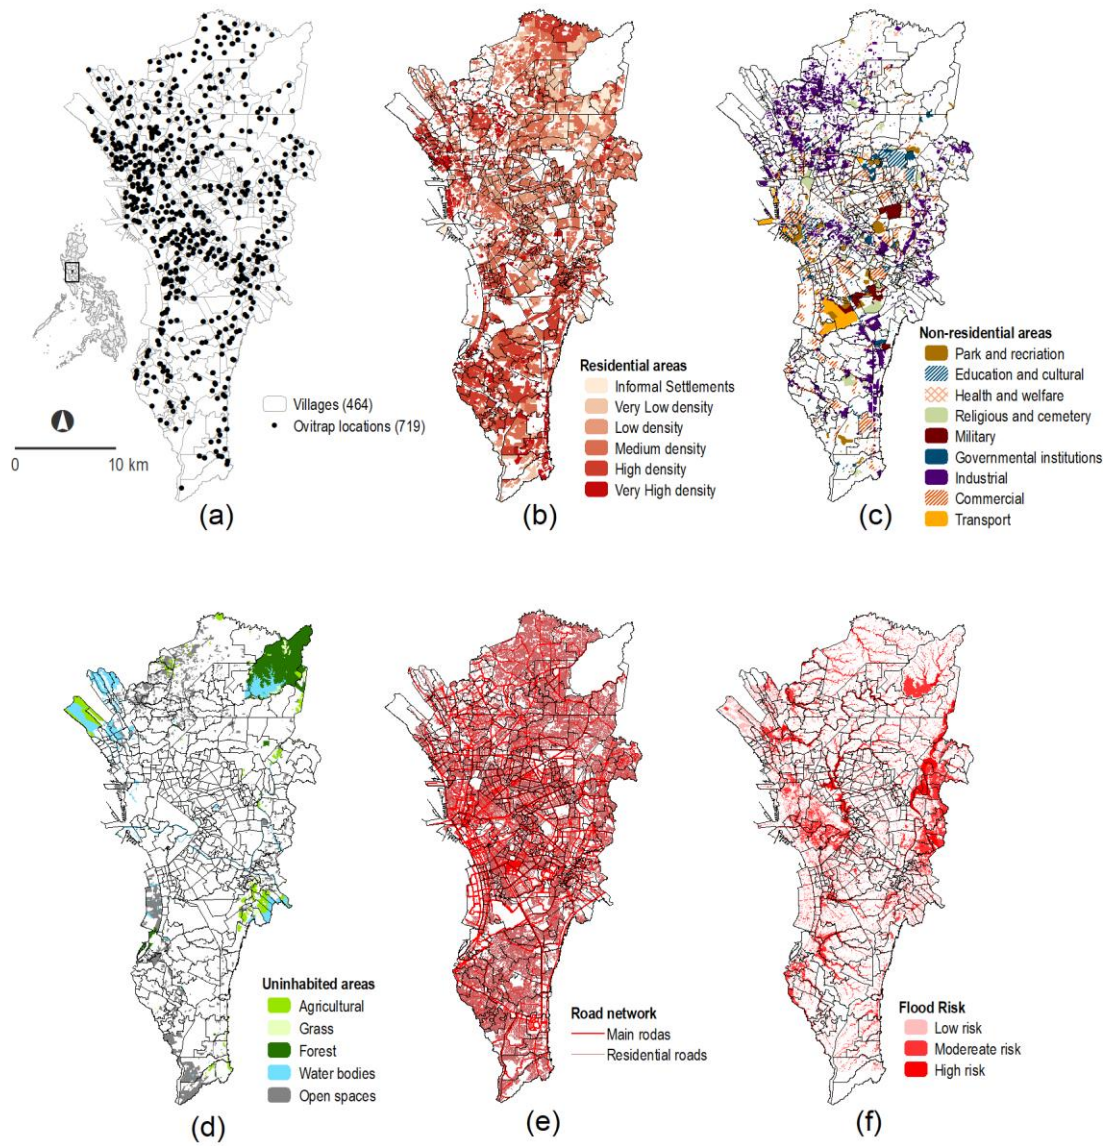

298

299 Figure 1: Administrative boundaries of Metropolitan Manila showing: (a) Ovitrap locations; Landscape  
300 features: (b) Residential areas classified according to densities, (c) Non-residential areas, (d) Uninhabited  
301 areas, (e) Road networks, and (f) Flood risk.

302

## 303 RESULTS

### 304 Cross-correlation analysis

305 Precipitation yield had the highest positive and significant correlation with dengue incidence ( $r$   
306 = 0.69,  $p = 0.00$ ) at a one-month lag, followed by OI ( $r = 0.52$ ,  $p = 0.05$ ) and temperature ( $r = 0.52$ ,  $p =$   
307 0.05), both at a three-month lag. Vegetation displayed a negative and significant correlation ( $r = -0.71$ ,  $p$   
308 = 0.00) at a one-month lag (Table 1). Vegetation showed the highest positive correlation with the OI ( $r =$   
309 0.77,  $p = 0.00$ ) at a three-month lag, followed by temperature ( $r = 0.73$ ,  $p = 0.00$ ) and precipitation ( $r =$   
310 0.48,  $p = 0.04$ ), both at a zero-month lag.

311 Table 1: Cross-Correlation Analysis of Temporal Climate Factors in Dengue Incidence and Ovitrap Index

| Variables     | Dengue incidence |           |            | Ovitrap index |           |            |
|---------------|------------------|-----------|------------|---------------|-----------|------------|
|               | Lag month        | $r$ value | $p$ value  | Lag month     | $r$ value | $p$ value  |
| Ovitrap Index | 3                | 0.52      | $p = 0.05$ | -             | -         | -          |
| Precipitation | 1                | 0.69      | $p = 0.00$ | 0             | 0.48      | $p = 0.04$ |
| Temperature   | 3                | 0.52      | $p = 0.05$ | 0             | 0.73      | $p = 0.00$ |
| Vegetation    | 1                | -0.71     | $p = 0.00$ | 3             | 0.77      | $p = 0.00$ |

312

### 313 Variable selection

314 Figure 2 shows the variable importance of the selected variables in the two RF models. The OI  
315 was significantly associated with 11 variables (three climatic factors and eight landscape factors). High  
316 residential density areas were ranked first, followed by precipitation, residential RND, temperature,  
317 medium residential density areas, vegetation, health institution areas, very high residential density areas,  
318 flood risk, commercial areas, and industrial areas (Figure 2a). Dengue incidence was significantly  
319 associated with eight variables (three climatic factors, four landscape factors, and OI). Precipitation was

320 ranked first, followed by temperature, commercial areas, high residential density areas, vegetation, OI,  
 321 flood risk, and residential RND (Figure 2b). These variables were used in the subsequent modeling.

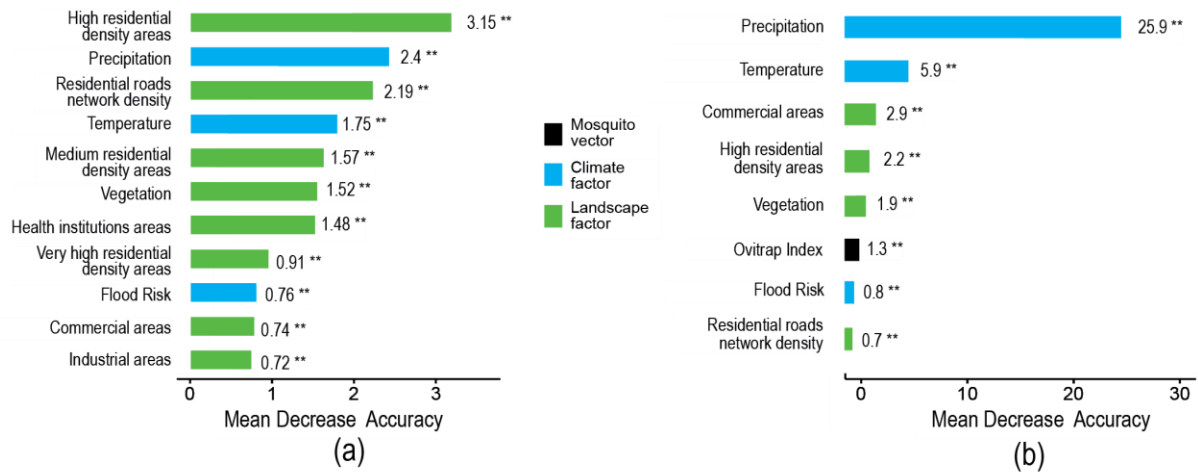

322  
 323 Figure 2: Variable importance measures of the variables with the most significant associations with (a)  
 324 ovitrap index and (b) dengue incidence; (\*\*) statistically significant at p < 0.05.

325  
 326 **Model-based recursive partitioning**

327 Figure 3a displays the MOB tree of the environmental conditions explaining the distribution of  
 328 the OI. The tree is composed of three partitioning levels and eight terminal nodes. Each terminal node  
 329 shows the average OI of a subset of the entire dataset based on selected landscape and climatic features  
 330 and labeled accordingly as terminal nodes OV-A1 to OV-A8. In the MOB tree, high residential density was  
 331 identified as the first-level partitioning variable and thus considered the most important environmental  
 332 feature. The succeeding levels were comprised of residential RND, precipitation, industrial areas, health  
 333 institutional areas, and flood prone areas. The order of the variables was agreed with the estimated  
 334 variable importance (Figure 2a). The average OI from node OV-A1 to OV-A8 ranged from 1.36 to 34.52%.



335 We employed further analyses to identify the interactive effects of the most important  
 336 predictor (i.e., high residential density) with other environmental factors on OI (Figure 3b). Higher slopes  
 337 and R-squared values were found in nodes OV-B4 and OV-B8 (0.30 ( $R^2 = 0.13$ ,  $p = 0.00$ ) and 0.25 ( $R^2 =$   
 338  $0.05$ ,  $p = 0.00$ ), respectively), indicating that the effect of high residential density areas on OI is  
 339 modulated by precipitation, residential roads, and industrial areas. Discordant associations of high  
 340 residential density areas to OI were observed for flood risk. A negative slope of  $-0.18$  ( $R^2 = 0.02$ ,  $p = 0.00$ )  
 341 was found when the flood risk was lower or equal to 0.36 (node OV-B5) whereas a positive slope of 0.07  
 342 ( $R^2 = 0.01$ ,  $p = 0.02$ ) was found when the flood risk was greater than 0.36 (node OV-B6).

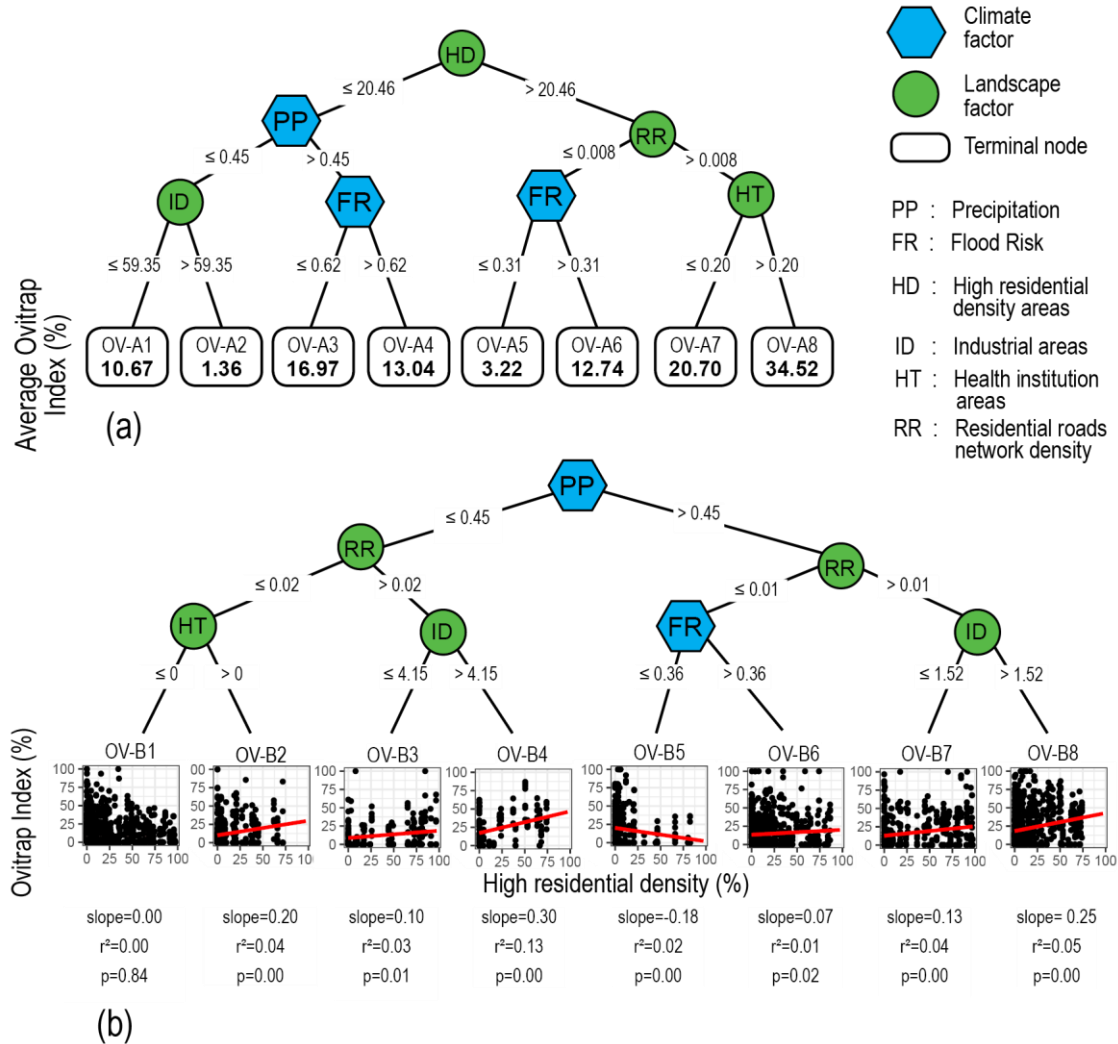

343

344 Figure 3: Recursive partitioning trees for identifying the (a) most influential variables on the ovitrap index  
345 and (b) interactive effects between environmental factors and the ovitrap index.

346 Figure 4a shows the MOB tree of the influence of climatic and landscape factors on dengue  
347 incidence. This tree is composed of eight terminal nodes generated from three partitioning levels. Each  
348 terminal node shows the average dengue incidence of a subset of the entire dataset based on selected  
349 climatic and landscape factors and is labeled accordingly as terminal nodes DI-A1 to DI-A8. Precipitation  
350 was the partitioning variable in the first and second partitioning levels and thus considered the most  
351 important environmental feature, similar to the RF analysis (Figure 2b). The succeeding partitioning levels  
352 comprised commercial and high residential density areas. The average dengue incidence on the terminal  
353 nodes DI-A1 to DI-A8 ranged from 0.04 to 0.51.

354 We employed further analyses to infer the interactive effect of the most important predictor  
355 (precipitation) with other environmental factors on dengue incidence (Figure 4b). We specified  
356 precipitation as the main predictor and the remaining variables as interacting factors. Higher slopes and  
357 R-squared values were found in relation to two different interaction patterns and were considered  
358 influential toward dengue incidence. The first pattern involved interactions between precipitation,  
359 commercial areas, and high residential density areas (nodes DI-B7 and DI-B4, with slopes of 0.44 ( $R^2 =$   
360 0.24,  $p = 0.00$ ) and 0.39 ( $R^2 = 0.17$ ,  $p = 0.00$ ), respectively). The second pattern involved interactions  
361 between precipitation, commercial areas, high residential density areas, and flood risk (nodes DI-B6 and  
362 DI-B2, with slopes of 0.41 ( $R^2 = 0.16$ ,  $p = 0.00$ ) and 0.39 ( $R^2 = 0.16$ ,  $p = 0.00$ ), respectively).

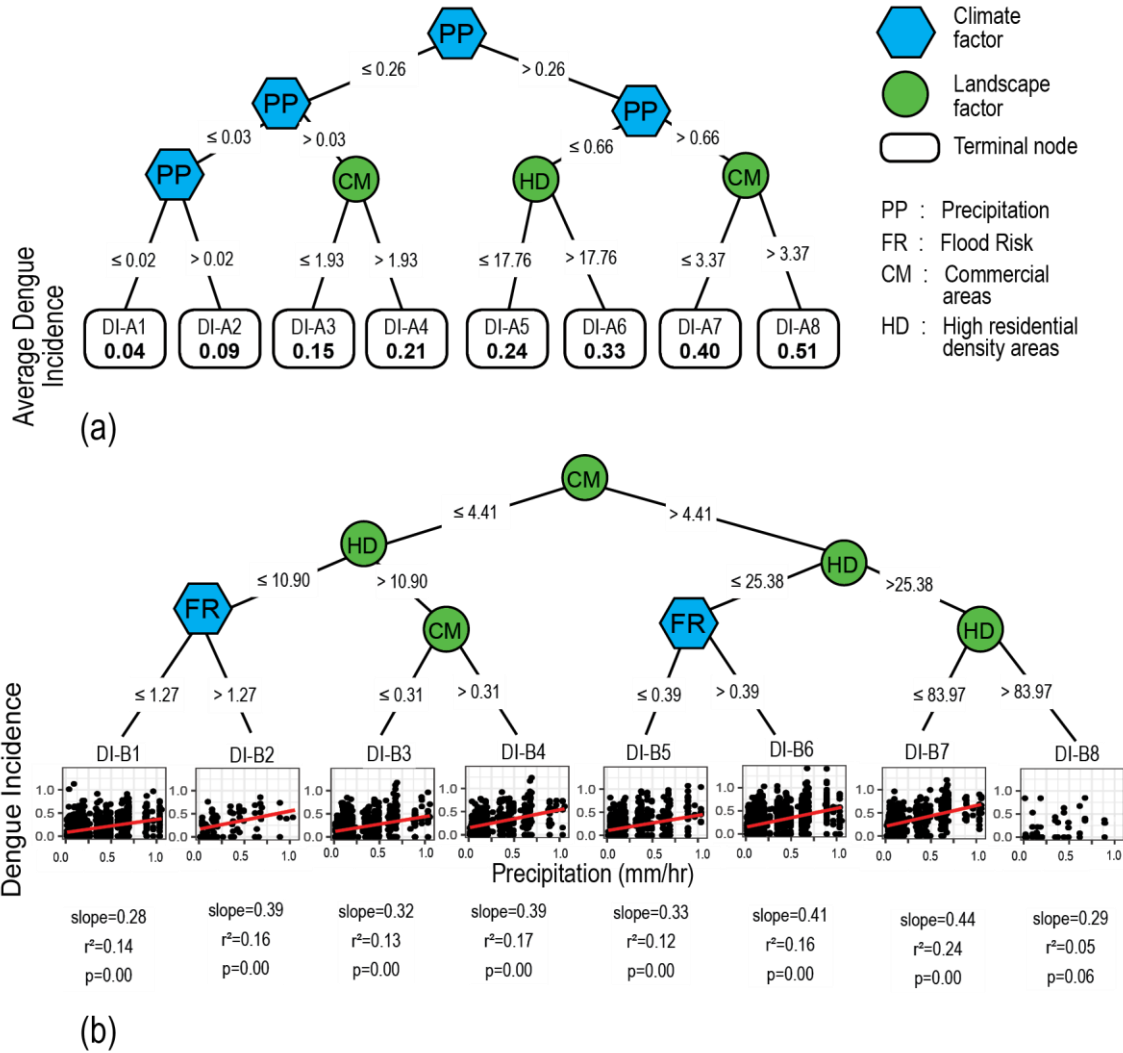

363

364 Figure 4: Recursive partitioning trees for identifying the (a) most influential variables on dengue incidence

365 and (b) the interactive effects between environmental factors and dengue incidence.

## 366 DISCUSSION

367 The interactive effects between high residential density, precipitation, and other landscapes in  
368 modulating ovitrap index

369 Ovitrap, in general, can detect the presence of both *Ae. aegypti* and *Ae. albopictus*. However,  
370 the OI data utilized in this study does not contain any information on the proportion of these two species.

371 Therefore, in this section, our discussion focuses solely on *Ae. aegypti*. This is because previous studies  
372 that surveyed selected areas of Metropolitan Manila indicated a high infestation rate of *Ae. aegypti*  
373 (>80%) (Mistica, et al. 2019, Carvajal, Ho, et al. 2019), thereby making it the primary vector for dengue  
374 transmission.

375 Both the RF and MOB tree (Figures 2a and 3a) analyses clearly indicate the importance of high  
376 residential density areas on the overall distribution of the OI. This finding is consistent with previous  
377 studies reporting that high residential areas are potential sources of breeding sites and blood meals for  
378 *Ae. aegypti* (Ngugi, et al. 2017). These areas are highlighted as the foremost breeding sites for *Ae. aegypti*  
379 due to the permanent availability of breeding containers and humans, who serve as blood sources (Higa  
380 2011, Ngugi, et al. 2017, Little, Bajwa and Shaman 2017). Herewith, residential areas exhibited ecological  
381 requirements to serve as main mosquito habitats compared with other types of landscapes.

382 To determine how high residential density areas interact with other environmental factors in  
383 modulating OI, we employed further analyses by specifying high residential density areas as the main  
384 predictor and the remaining variables as interacting factors (Figure 3b). The influence of high residential  
385 density areas on mosquito occurrence became clearer under certain environmental conditions. The two  
386 nodes OV-B4 and OV-B8 with the highest slopes (0.30 and 0.25, respectively) were formed in high  
387 industrial areas (>4.15 and >1.52%, respectively) and high residential road areas (>0.02 and >0.01 m/m<sup>2</sup>,  
388 respectively), and node OV-B4 had a low precipitation condition ( $\leq 0.45$  mm/hr). Since *Ae. aegypti*  
389 preferentially breeds in small water containers exposed to the outdoors (Carvajal, Ho, et al. 2019, Ngugi,  
390 et al. 2017), little rainfall might be sufficient to maintain optimal levels of water suitable for mosquito  
391 emergence. Conversely, enhanced rainfall might flush out mosquito eggs and larvae from breeding  
392 containers and reduce the sensitivity of the OI to changes in high residential density areas. The  
393 destructive effect of significant precipitation on mosquito development has been suggested in another

394 work (Dickin, Schuster-Wallace and Elliott 2013); however, the possible precipitation thresholds remain  
395 unclear.

396 Residential RND was the partitioning variable on the second level of the MOB tree.  
397 Furthermore, nodes OV-B4 and OV-B8, which had the highest slopes, were partitioned with higher  
398 residential road densities ( $>0.02$  and  $>0.01$  m/m<sup>2</sup>, respectively). These results suggest an enhanced  
399 vulnerability to mosquito occurrence in high residential density areas with a higher density of residential  
400 roads. Roads not only serve as transportation networks for people and goods but are also simultaneously  
401 accompanied by drainage components (e.g., roadside drains or canals, drain sumps), which collect surface  
402 water runoff for discharge in appropriate locations to avoid flooding. However, in many cases, efficient  
403 drainage in residential areas can be compromised by the encroachment of concrete structures or garbage  
404 clogging canals (Lagmay, et al. 2015). These interferences can inhibit complete water flow, resulting in  
405 spots of accumulated water, which can create favorable habitats for *Ae. aegypti* (Paploski, et al. 2016).  
406 Growing evidence has suggested a positive association between drainage and the occurrence of *Ae.*  
407 *aegypti* in Singapore (Seidahmed, et al. 2018), Brazil (Souza, et al. 2017) and Australia (Montgomery, et  
408 al. 2004).

409 Notably, with increased precipitation ( $>0.45$  mm/hr), high residential density areas showed an  
410 opposite association to OI depending on the flood risk (Figure 3b). Increased flood risk led to a positive  
411 association between high residential density areas and OI (node OV-B6) whereas reduced flood risk led to  
412 a negative association (node OV-B5). Breeding containers located in high residential density areas with a  
413 higher flood risk, despite being watered by rainwater or water for domestic usage, might have a higher  
414 chance to be reached by flood waters. However, flood waters can also extend the range of potential  
415 habitats for mosquitoes (Yee, et al. 2019). Even more unusual breeding sites such as underground septic  
416 tanks were reported as favorable for *Ae. aegypti* reproduction in residential areas in Puerto Rico (R.  
417 Barrera, et al. 2008). These conflicting potential effects of flood on mosquito habitats might explain the

418 higher vulnerability for mosquito occurrence in high residential density areas with higher flood risks (node  
419 OV-B6) compared with high residential density areas with lower flood risks (node OV-B5).

420 Node OV-B1, which had less precipitation ( $\leq 0.45$  mm/hr), residential roads ( $\leq 0.02$  m/m<sup>2</sup>), and  
421 no health institution areas ( $\leq 0\%$ ), is an extreme situation of null sensitivity of the OI toward high  
422 residential density areas. This node's slope (0.00,  $R^2 = 0.00$ ,  $p = 0.84$ ) might indicate that the mixture of  
423 other types of landscapes with residential areas is essential to enhance the sensitivity of the OI in high  
424 residential density areas. However, further work is necessary to test this hypothesis and explain potential  
425 mechanistic effects.

426 The adaptation of *Ae. aegypti* closer to human settlements does not seem to be solely  
427 influenced by environmental factors; certain human practices (e.g., housing in flood prone areas, weak  
428 environmental sanitation, obstruction of drainage canals, water storage practices for domestic usage)  
429 might contribute to the occurrence of mosquitoes. Therefore, environmental improvement and  
430 integrated control measures at the community level to improve the environment surrounding households,  
431 careful domestic water storage, and other sanitation practices are the most promising solutions for  
432 reducing the occurrence of mosquitoes.

433 The environmental conditions associated with mosquito occurrence must be carefully  
434 interpreted given the nature of the mosquito occurrence data (OI) utilized in this study. The OI is based  
435 on the percentage of positive ovitraps and can detect the presence or absence of vectors. However, it has  
436 limited capacity in displaying the precise range of mosquito density in the environment (Harburguer, et al.  
437 2016). Therefore, the environmental conditions inferred from this ovitrap MOB tree might only display  
438 the conditions for mosquito oviposition and not necessarily the conditions influencing mosquito  
439 abundance.

440 **Interactive effects between precipitation and landscapes in modulating dengue incidence**

441 Both RF (Figure 2b) and MOB tree (Figure 4a) analyses showed a significant influence of  
442 precipitation with a combinatory influence of high residential density and commercial areas in increasing  
443 dengue incidence. The significant influence of precipitation agrees with previous studies in the Philippines  
444 (Carvajal, Viacrusis, et al. 2018, Su 2008) and Malaysia (Dickin, Schuster-Wallace and Elliott 2013), which  
445 reported precipitation as a main driver of the temporal variation of dengue incidence. These studies  
446 assumed that the high correlation between precipitation and dengue incidence is due to the increasing  
447 mosquito density during the rainy season. On the MOB tree (Figure 4a), precipitation was the partitioning  
448 variable on the first and second levels whereas high residential and commercial areas were selected as  
449 partitioning variables on level 3. Overall, dengue incidence MOB trees support the significant influence of  
450 precipitation on dengue incidence.

451 Previous studies have discussed the impact of precipitation on the increased number of dengue  
452 cases because of its role in increasing the number of available breeding sites for mosquitoes (Carvajal, Ho,  
453 et al. 2019, Pasin, et al. 2018). However, the transference of viruses from mosquitoes to humans occurs  
454 when the dynamics between the vector, the virus, and hosts are favorable (de Melo, Scherrer and Eiras  
455 2012). These conditions include the ratio of infected mosquitoes, human behavior, human exposure, and  
456 the ability of mosquitoes to transfer pathogens to humans (Thi, et al. 2017). Human behavior and  
457 exposure can also be altered by meteorological conditions (Akter, et al. 2017). Precipitation combined  
458 with floods, for example, can generate changes in the physical environment such as damaging shelters,  
459 which can alter urban dynamics (e.g., population displacement, increase of human exposure to vectors),  
460 thus favoring dengue transmission (Few, et al. 2004).

461 In the variable selection step, precipitation showed a very strong influence on dengue incidence  
462 compared with other environmental factors. We conducted further analyses to evaluate the combinatory  
463 influence of precipitation with other environmental factors in modulating dengue incidence (Figure 4b).  
464 The association between precipitation and dengue incidence was further notable in these analyses,

465 particularly in areas covered by high residential and commercial areas, suggesting a vulnerability of these  
466 landscapes in modulating dengue incidence. The highest slope (0.44,  $R^2 = 0.24$ ,  $p = 0.00$ ) was reported for  
467 node DI-B7 (Figure 4b), which incorporates interactions between precipitation, commercial areas  
468 (>4.41%), and high residential density areas (between 25.38 and 83.97%). Herewith, this nodal pathway  
469 was considered the most influential environmental condition for increasing dengue incidence with high  
470 precipitation. The second highest slope (0.39,  $R^2 = 0.17$ ,  $p = 0.00$ ) was reported for node DI-B4 and  
471 formed with environmental conditions of commercial areas ( $0.31 < \text{commercial areas} \leq 4.41\%$ ) and high  
472 residential density areas (>10.90%). With these influential patterns observed in terminal nodes DI-B7 and  
473 DI-B4, we suggest that certain ecological factors in commercial and high residential areas can enhance  
474 dengue transmission with precipitation. Previous studies have shown that residential and commercial  
475 areas experience the most damaged houses during extreme rainfall and flood events in Metropolitan  
476 Manila (Porio 2014, a, Porio 2011, b). Damage to families' shelters, followed by massive displacements,  
477 might subject many people to deteriorated conditions with limited capacity to observe disease  
478 prevention and vector control measures. The high human exposure to vectors in these areas might create  
479 an avenue for high dengue transmission. A highly sensitive influence of precipitation on increasing  
480 dengue incidence was observed under high flood risk conditions (DI-B6 and DI-B2). These terminal nodes  
481 showed higher slopes of 0.41 ( $R^2 = 0.16$ ,  $p = 0.00$ ) and 0.39 ( $R^2 = 0.16$ ,  $p = 0.00$ ), respectively. Conversely,  
482 terminal nodes with lower flood risk (nodes DI-B1 and DI-B5, with slopes of 0.28 ( $R^2 = 0.14$ ,  $p = 0.00$ ) and  
483 0.33 ( $R^2 = 0.12$ ,  $p = 0.00$ ), respectively) displayed less sensitivity in increasing dengue incidence. These  
484 examples illustrate that the vulnerability for dengue transmission in residential and commercial areas  
485 with high precipitation can be further enhanced by floods. Floods can contribute to increased mosquito  
486 density and force people to live confined in deteriorated conditions of habitability with high exposure to  
487 vectors. The combination of human presence and exposure to vectors has been linked to high dengue  
488 transmission in residential (Scott and Morrison 2010, de Moura Rodrigues, et al. 2015) and commercial



489 areas (Honório, et al. 2009, Thammapalo, et al. 2007). Due to the anthropophilic nature of *Ae. Aegypti*,  
490 high human presence and exposure in these areas may increase feeding opportunities for mosquitoes  
491 and increase the chances of dengue fever infections (Koyadun, Butraporn and Kittayapong 2012).  
492 Because many people are exposed in areas with high precipitation levels, it becomes easier for  
493 mosquitoes to bite and infect many people in a short time, thus increasing the incidence of dengue (Akter,  
494 et al. 2017).

495 We expected that the resulting dengue incidence and ovitrap MOB trees (Figure 3a and 3b)  
496 would yield similar tree topology patterns. This expectation assumed that the high dengue incidence  
497 during the rainy season is a result of high mosquito abundance influenced by precipitation. However, our  
498 result was contrary to our assumption and could be explained by methodological limitations. The OI is  
499 based on the percentage of positive ovitraps with the presence or absence of vectors; however, it has a  
500 limited capacity in precisely displaying the range of mosquito density in the environment transmitting  
501 dengue. Although ovitraps are fast and cost-effective tools for monitoring the presence of mosquitoes,  
502 the OI has a low association with dengue incidence compared with adult mosquito abundance data (de  
503 Melo, Scherrer and Eiras 2012). Additional correlation analyses (data not shown) of the OI and dengue  
504 incidence from the terminal nodes of Figure 3a and 3b were not significantly correlated. Therefore, the  
505 mosquito occurrence data (OI) utilized in this study might be responsible for the dissimilarities in the  
506 ovitrap and dengue incidence MOB tree topology patterns.

507

#### 508 **Accessibility of data, modeling approach, and limitations**

509 Most previous epidemiological studies faced limitations when integrating climatic and  
510 landscape data given the scarcity of data and modeling techniques. Although we consider landscape to be  
511 static in this study, the model development did not distinguish dynamic or static terms. Since the physical

512 characteristics of each village did not change significantly over the three years, we assumed that these  
513 characteristics remained the same for each month of the study period. Based on this assumption, we  
514 utilized a data structure from previous studies that repeated the values of the static variables for the  
515 monthly values of the climate variables in each village (Kaul, et al. 2018). This design allowed us to analyze  
516 dengue epidemiology as a function of the combinatory influences of climate dynamics over the static  
517 landscape.

518           Many methods from conventional statistics and machine learning may, in principle, be used to  
519 handle datasets with temporal and spatial dimensions. Usually a statistical model suggests empirical  
520 relationships between variables to generate specific outcomes based on certain assumptions and a priori  
521 knowledge of the modeled dynamics (Bzdok, Altman and Krzywinski 2018, Kapwata and Gebreslasie  
522 2016). By contrast, machine learning does not require a specific model structure in advance. The  
523 algorithm itself can automatically utilize the original input data to identify hidden patterns in complex  
524 data structure (Richter and Khoshgoftaar 2018). Beforehand, statistics requires us to declare a formal  
525 model that incorporates our knowledge of the system. Thus, before implementing a model, careful  
526 inspection of the data is necessary (e.g., normal distribution) (Olden, Lawler and Poff 2008). Machine  
527 learning makes minimal assumptions about the data structure and can be effective even when the data  
528 are gathered without a carefully controlled experimental design (Bzdok, Altman and Krzywinski 2018).  
529 Additionally, machine learning is less sensitive to outliers and can efficiently address higher  
530 dimensionality variables even in the presence of complicated nonlinear interactions among covariates  
531 (Olden, Lawler and Poff 2008). The increase in data complexity may inherit some disadvantages to  
532 classical statistical methods. Instead, we utilized a machine learning approach such as RF for variable  
533 selection and recursive partitioning for subset selection because of their ability to handle complex  
534 datasets and evaluate nonlinear relationships in the data without having to satisfy the restrictive  
535 assumptions required by conventional approaches.

536 Machine learning, specifically RF, is often the preferred modeling method in a wide variety of  
537 epidemiological studies due to its capability to handle large datasets and accurately identify the best  
538 predictors (Kapwata and Gebreslasie 2016). However, many studies only ranked the relative importance  
539 of individual variables in influencing mosquitoes and dengue. Ranking the importance of variables alone is  
540 not enough to infer the dynamics occurring in the environment and their influence on dengue  
541 epidemiology (Sallam, et al. 2017). As discussed previously, there are multiple interacting factors in the  
542 environment that could play important roles in influencing mosquito and dengue occurrence. RF was able  
543 to handle the initial dataset and screen the most relevant variables associated with the OI and dengue  
544 incidence. Although RF can identify the most important variables, it cannot explain the interactions  
545 among covariates. Therefore, a recent study recommends also applying a machine learning method that  
546 is relatively easy to interpret (Ryo, Angelov, et al. 2020). By utilizing the recursive partitioning method in  
547 this study, we demonstrated important mechanistic interplays between environmental factors and  
548 presented specific conditions influencing the OI and dengue incidence. Furthermore, the same variables  
549 were identified as most influential on dengue and mosquitoes in RF and recursive partitioning. This  
550 consistency of results indicates the appropriateness of the adopted study design in capturing  
551 combinatory influences among environmental factors. However, since the data utilized are limited (July-  
552 December), subsequent studies should be conducted to infer whether complete data (January-  
553 December) with a similar modeling approach leads to different or similar results.

554 The utilization of RS in our study made it possible to access spatiotemporal temperature,  
555 precipitation, and vegetation data for each village. These types of data overcome the limited accessibility  
556 of such information at fine scales in areas where the spatial coverage of weather stations is coarse  
557 (German, et al. 2018). By using Google Earth Pro, we were able to use cloud computation to conduct all  
558 preliminary processing of the data, which significantly shortened the working time. Moreover, detailed LU  
559 maps can distinguish the risk of dengue and mosquito occurrence at a fine scale. Many studies that used

560 coarse LU classification, for example, reported that *Ae. aegypti* and dengue incidence are positively  
561 correlated with residential areas (Vanwambeke, Lambin, et al. 2007, Vanwambeke, N.Bennett and Kapan  
562 2011, Sarfraz, et al. 2012). In this study, we demonstrated that the distributions of mosquito and dengue  
563 can also vary depending on the type of density in these residential areas.

564 Our study, however, has certain limitations. As mentioned in the methods, the entomological  
565 data used in this study are incomplete and only correspond to the months of July-December of 2012–  
566 2014. This period covers the rainy season in Metro Manila. Therefore, the lack of dry season data  
567 (January-June) causes potential bias in our study. Furthermore, ovitraps were installed in only 298 of 464  
568 villages across Metro Manila. Complete data may better describe mechanistic understanding of  
569 associations between the dengue metrics and ambient environment factors. Nevertheless, our findings  
570 may still reflect the actual circumstances of LU and climatological characteristics of the study area. The  
571 results of the combinatory influences of landscape and climate may differ in other urban cities,  
572 particularly in rural areas in the Philippines and other dengue-endemic countries. Nonetheless, the  
573 methodology presented in this study can infer interplays between climate and landscape on mosquito  
574 occurrence and dengue incidence.

575 Our study demonstrated notable combinatory effects between climate and landscape in  
576 relation to the occurrence of mosquitoes and dengue incidence. It suggests discordant patterns wherein  
577 the OI is primarily influenced by landscapes and modulated by the effects of precipitation. Dengue  
578 incidence is primarily influenced by precipitation and modulated by landscapes. Such understanding and  
579 knowledge can further strengthen the design and implementation of prevention and control measures  
580 against dengue vectors and disease.

581 In recent years, vector control efforts in eliminating mosquito breeding sites have intensified in  
582 residential areas by identifying and destroying breeding sites. However, we demonstrated that the

583 existence of potential breeding sites in the landscape is not the only reason for dengue transmission.  
584 These efforts should be accompanied by effective improvements in urban settings by making them more  
585 resilient to mosquito-vectored diseases.

## 586 **Acknowledgments**

587 We thank Katherine M. Viacrusis, Lara Fides T. Hernandez, and Howell T. Ho from Trinity  
588 University of Asia for collecting and providing the data on notified dengue fever cases. This study was  
589 supported in part by the Japan Society for the Promotion of Science (JSPS) Grant-in-Aid Fund for the  
590 Promotion of Joint International Research (Fostering Joint International Research (B)) under grant  
591 number 19KK0107, JSPS Grant-in-Aid for Scientific Research (A) under grant number 19H01144, the JSPS  
592 Core-to-Core Program B. Asia-Africa Science Platforms, and the Endowed Chair Program of the Sumitomo  
593 Electric Industries Group Corporate Social Responsibility Foundation.

594 The authors declare they have no actual or potential competing interests.

595

## 596 **Data sharing**

597 Entomological data are available from the Department of Science and Technology  
598 (<http://oltrap.pchrd.dost.gov.ph/>); epidemiological data are available from the National Epidemiology  
599 Center, Department of Health–Philippines, upon request; meteorological (Precipitation and Temperature)  
600 and vegetation data from remote sensing are available through GEE  
601 (<https://code.earthengine.google.com/>); land use data from the Geoportal Philippine website  
602 ([www.geoportal.gov.ph](http://www.geoportal.gov.ph)) are available upon request; population statistics of Metro Manila are available  
603 from Philippine Statistics Authority (<http://www.psa.gov.ph>); and flood risk data are available from LiDAR  
604 Portal for Archiving and Distribution website (<https://lipad.dream.upd.edu.ph>).

605

606 REFERENCES

- 607 Akter, Rokeya, Wenbiao Hu, Suchithra Naish, Shahera Banu, and Shilu Tong. 2017. "Joint effects of  
608 climate variability and socioecological factors on dengue transmission: epidemiological  
609 evidence." *Tropical Medicine and International Health* 22 (6): 656–669. doi:10.1111/tmi.12868.
- 610 Araujo, Ricardo V., Marcos R. Albertini, André L. Costa-da-Silva, Lincoln Suesdek, Nathália C. S.  
611 Franceschi, Nancy M. Bastos, Gizelda Katz, et al. 2015. "São Paulo urban heat islands have a  
612 higher incidence of dengue than other urban areas." *Braz J Infect Dis* 19(2): 146–155.
- 613 Arcari, Paula, Nigel Tapper, and Sharron Pfueller. 2007. "Regional variability in relationships between  
614 climate and dengue/DHF in Indonesia." *Singapore Journal of Tropical Geography* 28 (3): 251-272.
- 615 Asian Development Bank. 2014. Republic of the Philippines National Urban Assessment. Philippines: ADB.
- 616 Asian Green City Index. 2011. Assessing the environmental performance of Asia's major cities. Munich,  
617 Germany: Siemens AG.
- 618 Baquero, Oswaldo Santos, Lidia Maria Reis Santana, and Francisco Chiaravalloti-Neto. 2018. "Dengue  
619 forecasting in São Paulo city with generalized additive models, artificial neural networks and  
620 seasonal autoregressive integrated moving average models." *PLoS ONE* 3(4) (e0195065).  
621 doi:10.1371/journal.pone.0195065.
- 622 Barrera, R., M. Amador, A. Diaz, J. Smith, J.L. Munoz-Jordan, and Y. Rosario. 2008. "Unusual productivity  
623 of *Aedes aegypti* in septic tanks and its implications for dengue control." *Medical and Veterinary  
624 Entomology* ( 22: 60-69.
- 625 Barrera, Roberto, Manuel Amador, and Andrew J. MacKay. 2011. "Population Dynamics of *Aedes aegypti*  
626 and Dengue as Influenced by Weather and Human Behavior in San Juan, Puerto Rico." *PLoS Negl  
627 Trop Dis* 125(12) (e1378). doi:10.1371/journal.pntd.0001378.
- 628 Bavia, Lorena, Francine N. Melanda. Thais B. de Arruda, Ana L. P. Mosimann, Guilherme F. Silveira,  
629 Mateus N. Aoki, Diogo Kuczera, Maria Lo Sarzi, et al. 2020. "Epidemiological study on dengue in  
630 southern Brazil under the perspective of climate and poverty." *Scientific Reports* 10 (1): 1-16.
- 631 BBC News. 2012. Floods paralyse Philippine capital Manila. 8 7. Accessed 2 19, 2020.  
632 <https://www.bbc.com/news/world-asia-19159509>.
- 633 Bostan, Nazish, Sundus Javed, Nabgha-e-Amen, Syed Ali Musstjab Akber Shah Eqani, Faheem Tahir, and  
634 Habib Bokhari. 2017. "Dengue fever virus in Pakistan: effects of seasonal pattern and  
635 temperature change on distribution of vector and virus." *Rev. Med. Virol* 27 (1).  
636 doi:10.1002/rmv.1899.
- 637 Breiman, Leo. 2001. "Random Forests." *Machine Learning* 5-32.
- 638 Buczak, Anna L., Benjamin Baugher, Steven M. Babin, Liane C. Ramac-Thomas, Erhan Guven, Yevgeniy  
639 Elbert, Phillip T. Koshute, et al. 2014. "Prediction of High Incidence of Dengue in the Philippines."  
640 *PLOS Neglected Tropical Diseases* 8 (4).

- 641 Bzdok, Danilo, Naomi Altman, and Martin Krzywinski. 2018. "Statistics versus Machine Learning." *Nature*  
642 *Methods* 15 (4): 233-234.
- 643 Carvajal, Thaddeus M., Howell T. Ho, Lara Fides T. Hernandez, Katherine M. Viacrusis, Divina M. Amalin,  
644 and Kozo Watanabe. 2019. "An Ecological Context Toward Understanding Dengue Disease  
645 Dynamics in Urban Cities: A Case Study in Metropolitan Manila, Philippines." In *Health in*  
646 *Ecological Perspectives in the Anthropocene*, 117-131. Singapore: Springer Nature Singapore Pte  
647 Ltd. doi:10.1007/978-981-13-2526-7\_10.
- 648 Carvajal, Thaddeus M., Katherine M. Viacrusis, Lara Fides T. Hernandez, Howell T. Ho, Divina M. Amalin,  
649 and and Kozo Watanabe. 2018. "Machine learning methods reveal the temporal pattern of  
650 dengue incidence using meteorological factors in metropolitan Manila, Philippines." *BMC*  
651 *Infectious Diseases* 18 (1): 1-15.
- 652 Chan, Miranda, and Michael A. Johansson. 2012. "The Incubation Periods of Dengue Viruses." *PLoS ONE*  
653 7(11) (e50972). doi:10.1371/journal.pone.0050972.
- 654 Chang, Chi-Ru, Ming-Huang Li, and Shyh-Dean Chang. 2007. "A preliminary study on the local cool-island  
655 intensity of Taipei city parks." *Landscape and Urban Planning* 80 (4): 386–395.
- 656 Chen, Yirong, Janet Hui Yi Ong, Jayanthi Rajarethinam, Grace Yap, Lee Ching Ng, and Alex R. Cook. 2018.  
657 "Neighbourhood level real-time forecasting of dengue cases in tropical urban Singapore." *BMC*  
658 *Medicine* 16 (1): 1-13. doi:10.1186/s12916-018-1108-5.
- 659 Cheong, Yoon Ling, Pedro J. Leitão, and Tobia Lakes. 2014. "Assessment of Land use factors associated  
660 with dengue cases in Malaysia using Boosted Regression Trees." *Spatial and Saptio-temporal*  
661 *Epidemiology* 10: 75-84.
- 662 de Melo, Diogo Portella Ornelas, Luciano Rios Scherrer, and Álvaro Eduardo Eiras. 2012. "Dengue Fever  
663 Occurrence and Vector Detection by Larval Survey, Ovitrapp and MosquiTRAP: A Space-Time  
664 Clusters Analysis." *PLoS ONE* 7 (7): e42125. doi:10.1371/journal.pone.0042125.
- 665 de Moura Rodrigues, Marianni, Gisela Rita Alvarenga Monteiro Marques, Lígia Leandro Nunes Serpa,  
666 Marylene de Brito Arduino, Júlio Cesar Voltolini, Gerson Laurindo Barbosa, and Valmir Roberto  
667 Andrade. 2015. "Density of *Aedes aegypti* and *Aedes albopictus* and its association with number  
668 of residents and meteorological variables in the home environment of dengue endemic area,  
669 São Paulo, Brazil." *Parasites & Vectors* 8 (1): 1-9. doi:10.1186/s13071-015-0703-y.
- 670 Department of Trade and Industry. n.d. NCR - REGIONAL PROFILE. Accessed 2 17, 2020.  
671 <https://www.dti.gov.ph/regions/ncr/ncr-profile-of-region>.
- 672 DeVries, Ben, Chengquan Huang, John Armston, Wenli Huang, John W. Jones, and Megan W. Lang. 2020.  
673 "Rapid and robust monitoring of flood events using Sentinel-1 and Landsat data on the Google  
674 Earth Engine." *Remote Sensing of Environment* 28 (2): 153-224. doi:10.1016/j.rse.2020.111664.
- 675 Dickin, Sarah K., Corinne J. Schuster-Wallace, and Susan J. Elliott. 2013. "Developing a Vulnerability  
676 Mapping Methodology: Applying the Water-Associated Disease Index to Dengue in Malaysia."  
677 *PLoS ONE* 8 (5): e63584.

- 678 DOST. 2014. Climate of the Philippines. Philippine Atmospheric, Geophysical and Astronomical Services  
679 Administration. 9. Accessed 2 28, 2020. [http://bagong.pagasa.dost.gov.ph/information/climate-](http://bagong.pagasa.dost.gov.ph/information/climate-philippines)  
680 [philippines](http://bagong.pagasa.dost.gov.ph/information/climate-philippines).
- 681 —. n.d. Dengue Vector Surveillance. Accessed 10 4, 2018. <http://oltrap.pchrd.dost.gov.ph/>.
- 682 2013. DOST Mosquito Ovicidal/Larvicidal (OL) Trap for Dengue Prevention. 7 4. Accessed 1 20, 2020.  
683 [http://filipinoinventionsanddiscoveries.blogspot.com/2013/07/dost-mosquito-ovicidallarvicidal-](http://filipinoinventionsanddiscoveries.blogspot.com/2013/07/dost-mosquito-ovicidallarvicidal-ol_4.html)  
684 [ol\\_4.html](http://filipinoinventionsanddiscoveries.blogspot.com/2013/07/dost-mosquito-ovicidallarvicidal-ol_4.html).
- 685 Elith, J., J.R. Leathwick, and T.Hastie. 2008. "A working guide to boosted regression trees." *Jpournal of*  
686 *Animal Ecology* 77 (4): 802-813.
- 687 ESRI. 2016. How Kriging works. [https://desktop.arcgis.com/en/arcmap/10.3/tools/3d-analyst-](https://desktop.arcgis.com/en/arcmap/10.3/tools/3d-analyst-toolbox/how-kriging-works.htm)  
688 [toolbox/how-kriging-works.htm](https://desktop.arcgis.com/en/arcmap/10.3/tools/3d-analyst-toolbox/how-kriging-works.htm).
- 689 Few, Roger, Mike Ahern, Franziska Matthies, and Sari Kovats. 2004. Floods, health and climate change: a  
690 strategic review. Working Paper, Tyndall Centre for Climate Change Research.
- 691 Früh, Linus, Helge Kampen, Antje Kerkow, Günter A. Schaub, Doreen Walther, and Ralf Wieland. 2018.  
692 "Modelling the potential distribution of an invasive mosquito species: comparative evaluation of  
693 four machine learning methods and their combinations." *Ecological Modelling* 388: 136-144.  
694 doi:10.1016/j.ecolmodel.2018.08.011.
- 695 Garge, Nikhil R, Georgiy Bobashev, and Barry Eggleston. 2013. "Random forest methodology for model-  
696 based recursive partitioning: the mobForest package for R." *BMC Bioinformatic* 14 (1): 1-8.
- 697 Geofabrik GmbH. 2019. "OpenStreetMap Data in Layered GIS Format." 11 6.  
698 <http://download.geofabrik.de/osm-data-in-gis-formats-free.pdf>.
- 699 German, A., M. O. Espinosa, M. Abril, and C.M. Scavuzzo. 2018. "Exploring satellite based temporal  
700 forecst modelling of *Aedes aegypti* oviposition from an operational perspective." *Remote*  
701 *Sensing Applications: Society and Environment* 11: 231-240.
- 702 Gorelick, Noel Hancher, Matt Dixon, Mike Ilyushchenko, Simon Thau, David Moore, and Rebecca. 2017.  
703 "Google Earth Engine: Planetary-scale geospatial analysis for everyone." *Remote Sensing of*  
704 *Environment (Elsevier)* 202: 18-27. doi:10.1016/j.rse.2017.06.031.
- 705 Guo, Pi, Tao Liu, Qin Zhang, Li Wang, Jianpeng Xiao, Qingying Zhang, Ganfeng Luo, et al. 2017.  
706 "Developing a dengue forecast model using machine learning: A case study in China." *PLoS Negl*  
707 *Trop Dis* 10 (11): e0005973. doi:10.1371/journal.pntd.0005973.
- 708 Harburguer, Laura, Susana Licastro, Héctor Masuh, and Eduardo Zerba. 2016. "Biological and Chemical  
709 Characterization of a New Larvicide Ovitrap Made of PlasticWith Pyriproxyfen Incorporated for  
710 *Aedes aegypti* (Diptera: Culicidae) Control." *Journal of Medical Entomology* 53 (3): 647-652.  
711 doi:10.1093/jme/tjw022.
- 712 Hashizume, Masahiro, Ashraf M Dewan, Toshihiko Sunahara, M Ziaur Rahman, and Taro Yamamoto.  
713 2012. "Hydroclimatological variability and dengue transmission in Dhaka, Bangladesh: a time-  
714 series study." *BMC Infectious Diseases* 12 (1): 98.



- 715 Hayden, Mary H., Christopher K. Uejio, Kathleen Walker, Frank Ramberg, Rafael Moreno, Cecilia Rosales,  
716 Mercedes Gameros, Linda O. Mearns, Emily Zielinski-Gutierrez, and Craig R. Janes. 2010.  
717 "Microclimate and Human Factors in the Divergent Ecology of *Aedes aegypti* along the Arizona,  
718 U.S./Sonora, MX Border." *EcoHealth* 7 (1): 64–77. doi:10.1007/s10393-010-0288-z.
- 719 Higa, Yukiko. 2011. "Dengue Vectors and their Spatial Distribution." *Tropical Medicine and Health* 39:  
720 17-27. doi:doi: 10.2149.
- 721 Honório, N.A., R. M. R. Nogueira, C. T. Codeço, M. S. Carvalho, O. G. Cruz, M. A. F. M. Magalhães, J. M. G.  
722 Araújo, et al. 2009. "Spatial Evaluation and Modeling of Dengue Seroprevalence and Vector  
723 Density in Rio de Janeiro, Brazil." *PLoS Negl Trop Dis* 3 (11): e545.  
724 doi:doi:10.1371/journal.pntd.0000545.
- 725 Hothorn, Torsten, and Achim Zeileis. 2015. "partykit: A Modular Toolkit for Recursive Partytioning in R."  
726 *Journal of Machine Learning Research* 16 (1): 3905-3909.  
727 <http://jmlr.org/papers/v16/hothorn15a.html>.
- 728 Huffman, George J., and David T. Bolvin. 2018. "TRMM and Other Data Precipitation Data Set  
729 Documentation." 4 26.  
730 [https://pmm.nasa.gov/sites/default/files/document\\_files/3B42\\_3B43\\_doc\\_V7\\_180426.pdf](https://pmm.nasa.gov/sites/default/files/document_files/3B42_3B43_doc_V7_180426.pdf).
- 731 Ibarra, Anna M Stewart, Valerie A Luzadis, Mercy J Borbor Cordova, Mercy Silva, Tania Ordoñez, Efraín  
732 Beltrán Ayala, and 6,7 Sadie J Ryan1. 2014. "A social-ecological analysis of community  
733 perceptions of dengue fever and *Aedes aegypti* in Machala, Ecuador." *BMC Public Health* 14 (1):  
734 1135.
- 735 Jiménez, Mario González, Simon A. Babayan, Pegah Khazaeli, Margaret Doyle, Finlay Walton, Elliott  
736 Reedy, Thomas Glew, et al. 2019. "Prediction of mosquito species and population age structure  
737 using mid-infrared spectroscopy and supervised machine learning." *Wellcome Open Research* 4  
738 (76).
- 739 Kapwata, Thandi, and Michael T. Gebreslasie. 2016. "Random forest variable selection in spatial malaria  
740 transmission modelling in Mpumalanga Province, South Africa." *Geospatial Health* 11 (434): 251-  
741 262.
- 742 Kassambara, Alboukadel. 2019. "Package 'ggpubr.'" 'ggplot2' Based Publication Ready Plots. 11 14.  
743 Accessed 12 13, 2019. <https://cran.r-project.org/web/packages/ggpubr/ggpubr.pdf>.
- 744 Kaul, RajReni B., Michelle V. Evans, Courtney C. Murdoc, and John M. Drake. 2018. "Spatio-Temporal  
745 spillover risk of yellow fever in Brazil." *Parasites & Vectors* 11 (1): 488.
- 746 Kesetyaningsih, Tri Wulandari, Sri Andarini, Sudarto, and Henny Pramodyo. 2018. "etermination of  
747 Environmental Factors Affecting Dengue Incidence in Sleman District, Yogyakarta, Indonesia." "  
748 *African Journal of Infectious Diseases* 12 (1S): 13-25.
- 749 Kilpatrick, A. Marm, Mark A. Meola, Robin M. Moudy, and Laura D. Kramer. 2008. "Temperature, Viral  
750 Genetics, and the Transmission of West Nile Virus by *Culex pipiens* Mosquitoes." *PLoS Pathog* 4  
751 (6): e1000092. doi:10.1371/journal.ppat.1000092.

- 752 Koch-Nielsen, Holger. 1999. *Projectar Activamente com a Natureza*. Translated by Margarida David e  
753 Silva e José Forjaz. Horve: Development Advisory Group ApS.
- 754 Kopf, Julia, Thomas Augustin, and Carolin Strobl. 2010. *The Potential of Model-Based Recursive  
755 Partitioning in the Social Sciences –Revisiting Ockham’s Razor*. Munich: Department of Statistics,  
756 University of Munich.
- 757 Koyadun, Surachart, Piyarat Butraporn, and Pattamaporn Kittayapong. 2012. "Ecologic and  
758 Sociodemographic Risk Determinants for Dengue Transmission in Urban Areas in Thailand."  
759 *Interdisciplinary Perspectives on Infectious Diseases*. doi:10.1155/2012/907494.
- 760 Lagmay, A.M.F., J. Mendoza, K. Punay, N.E. Tingin, P.A. Delmendo, F. Cipriano, J. Serrano, L. Santos, G.  
761 Sabio, and M.A. Moises. 2015. Street floods in Metro Manila and possible solutions. 9 9.  
762 Accessed 8 17, 2020. <https://center.noah.up.edu.ph/street-floods-in-metro-manila-and-possible-solutions/>.
- 764 Leontjeva, Anna, and Ilya Kuzovkin. 2016. "Combining Static and Dynamic Features for Multivariate  
765 Sequence Classification." 2016 IEEE International Conference on Data Science and Advanced  
766 Analytics (DSAA). Montreal, QC, Canada: IEEE. 21-30. doi:10.1109/DSAA.2016.10.
- 767 Lin, Brenda B., Monika H. Egerer, Heidi Liere, Shalene Jha, Peter Bichier, and Stacy M. Philpott. 2018.  
768 "Local- and landscape-scale land cover affects microclimate and water use in urban gardens."  
769 *Science of the Total Environment* 610: 570–575.
- 770 LiPAD. 2018. LiDAR Portal for Archiving and Distribution. 1 18. Accessed 11 20, 2018. [https://lipad-  
771 fmc.dream.upd.edu.ph/layers/?limit=100&offset=0&keywords\\_\\_slug\\_\\_in=flood-hazard-map](https://lipad-fmc.dream.upd.edu.ph/layers/?limit=100&offset=0&keywords__slug__in=flood-hazard-map).
- 772 Little, Eliza, Waheed Bajwa, and Jeffrey Shaman. 2017. "Local environmental and meteorological  
773 conditions influencing the invasive mosquito *Ae. albopictus* and arbovirus transmission risk in  
774 New York City." *PLoS Negl Trop Dis* 11 (8): e0005828. doi:10.1371/journal.pntd.0005828.
- 775 Misslin, Renaud, and Éric Daudé. 2017. "An environmental suitability index based on the ecological  
776 constraints of *Aedes aegypti*, vector of dengue." *Revue Internationale de Géomatique* 27 (4):  
777 481-501.
- 778 Mistica, Myra S., Virginia R. Ocampo, Lilian A. De Las Llagas, Arlene G. Bertuso, Fe D. Alzona, and Ester A.  
779 Magsino. 2019. "A Survey of Mosquito Species in Public Schools of Metro Manila, Philippines  
780 Using Ovitrap as Surveillance Tool." *Acta Medica Philippina* 55 (4): 310-314.
- 781 Montgomery, Brian L., Scott A. Ritchie, Alistair J. Hart, Sharron A. Long, and Ian D. Walsh. 2004. "Subsoil  
782 Drain Sumps are key Container for *Aedes Aegypti* in Cairns, Australia." *Journal of the American  
783 Mosquito Control Association* 20 (4): 365-369.
- 784 Murdock, Courtney C., Michelle V. Evans, Taylor D. McClanahan, Kerri L. Miazgowicz, and Blanka Tesla.  
785 2017. "Fine-scale variation in microclimate across an urban landscape shapes variation in  
786 mosquito population dynamics and the potential of *Aedes albopictus* to transmit arboviral  
787 disease." *PLoS Negl Trop Dis* 11 (5): e0005640. doi:10.1371/journal.pntd.0005640.
- 788 Mwanga, Emmanuel P., Salum A. Mapua, Doreen J. Siria, Halfan S. Ngowo, Francis Nangacha, Joseph  
789 Mgando, Francesco Baldini, et al. 2019. "Using mid-infrared spectroscopy and supervised

- 790 machine-learning to identify vertebrate blood meals in the malaria vector, *Anopheles*  
791 *arabiensis*." *Malar J* 18 (1): 1-9. doi:10.1186/s12936-019-2822-y.
- 792 Naish, Suchithra, Pat Dale, John S Mackenzie, John McBride, Kerrie Mengersen, and Shilu Tong. 2014.  
793 "Climate change and dengue: a critical and systematic review of quantitative modelling  
794 approaches." *BMC infectious diseases* 14 (1): 167.
- 795 NAMRIA. n.d. Geoportal PH. Accessed 10 10, 2018. <http://www.geoportal.gov.ph/>.
- 796 Nasir, Shabab, Farhat Jabeen, Sadia Abbas, Iram Nasir, and Mustapha Debboun. 2017. "Effect of Climatic  
797 Conditions and Water Bodies on Population Dynamics of the Dengue Vector, *Aedes aegypti*  
798 (Diptera: Culicidae)." *J Arthropod-Borne Dis*, 11 (1): 50–59.
- 799 Nazri, C.D., A. Abu Hassan, Z. Abd Latif, and Rodziah Ismail. 2011. "Impact of Climate and Landuse  
800 variability based Dengue Epidemic Outbreak in Subang Jaya." *IEEE Colloquium on Humanities,*  
801 *Science and Engineering*. Penang: IEEE. 907-912.
- 802 Ngugi, Harun N., Francis M. Mutuku, Bryson A. Ndenga, Peter S. Musunzaji, Joel O. Mbakaya, Peter  
803 Aswani, Lucy W. Irungu, et al. 2017. "Characterization and productivity profiles of *Aedes aegypti*  
804 (L.) breeding habitats across rural and urban landscapes in western and coastal Kenya."  
805 *Parasites & Vectors* 10 (1): 331.
- 806 NOAA. 2015. Philippine flood hazard maps. Accessed 1 8, 2020. <http://www.nababaha.com/>.
- 807 OECD. 2018. Safety Assessment of Transgenic Organisms in the Environment, Volume 8, OECD  
808 Consensus Document of the Biology of Mosquito *Aedes aegypti*, Harmonisation of Regulatory  
809 Oversight in Biotechnology. Paris: OECD Publishing. doi:10.1787/9789264302235-en.
- 810 Olden, Julian D., Joshua J. Lawler, and N. LeRoy Poff. 2008. "Machine Learning Methods Without Tears: A  
811 Primer for Ecologists." *The Quarterly Review of Biology* 83 (2): 171-193.
- 812 Ong, anet, Xu Liu, Jayanthi Rajarethinam, Suet Yheng Ko, Shaohong Liang, Choon Siang Tang, Alex R.  
813 Cook, Lee Ching Ng, and Grace Yap. 2017. "Mapping dengue risk in Singapore using Random  
814 Forest." *PLoS Negl Trop Dis* 12(6) (e0006587).
- 815 Pappalardo, Igor Adolfo Dexheimer, Moreno S. Rodrigues, Vánio André Mugabe, Mariana Kikuti, Aline S.  
816 Tavares, Mitermayer Galvão Reis, Uriel Kitron, and Guilherme Sousa Ribeiro. 2016. "Storm  
817 drains as larval development and adult resting sites for *Aedes aegypti* and *Aedes albopictus* in  
818 Salvador, Brazil." *Parasites & Vectors* 9 (1): 1-8.
- 819 Pasin, Chloé, M. Elizabeth Halloran, Peter B. Gilbert, Edith Langevin, and R. Leon Ochiai. 2018. "Periods  
820 of high dengue transmission defined by rainfall do not impact efficacy of dengue vaccine in  
821 regions of endemic disease." *PLoS ONE* 13 (12): e0207878. doi:10.1371/journal.
- 822 Phanitchat, Thipruethai, Bingxin Zhao, Ubydul Haque, Chamsai Pientong, Tipaya Ekalaksananan, Sirinart  
823 Aromseree, Kesorn Thaewongiew, et al. 2019. "Spatial and temporal patterns of dengue  
824 incidence in northeastern Thailand 2006–2016." *BMC Infectious Diseases* 19 (1): 743.
- 825 PhilGIS. 2012. Philippine GIS Data Clearinghouse. 9 20. <http://philgis.org/>.

- 826 Philippines Statistics Authority. 2012. "The 2010 Census of Population and Housing Reveals the  
827 Philippine Population at 92.34 Million." 4 4. Accessed 12 6, 2018.  
828 [https://psa.gov.ph/sites/default/files/attachments/hsd/pressrelease/National%20Capital%20Re](https://psa.gov.ph/sites/default/files/attachments/hsd/pressrelease/National%20Capital%20Region.pdf)  
829 [gion.pdf](https://psa.gov.ph/sites/default/files/attachments/hsd/pressrelease/National%20Capital%20Region.pdf).
- 830 —. 2019. Urban Population in the Philippines (Results of the 2015 Census of Population). 3 21. Accessed  
831 8 21, 2019. [https://psa.gov.ph/content/urban-population-philippines-results-2015-census-](https://psa.gov.ph/content/urban-population-philippines-results-2015-census-population)  
832 [population](https://psa.gov.ph/content/urban-population-philippines-results-2015-census-population).
- 833 Piovezan, Rafael, Alexandre Visockas, Thiago Salomão de Azevedo, and Maria Anice Mureb Sallum. 2019.  
834 "Spatial-temporal distribution of *Aedes (Stegomyia) aegypti* and locations of recycling units in  
835 southeastern Brazil." *Parasites Vectors* 12 (1): 541. doi:10.1186/s13071-019-3794-z.
- 836 Pirkle, Catherine M, Yan Yan Wu, Maria-Victoria Zunzunegui, and José Fernando Gómez. 2018. "Model-  
837 based recursive partitioning to identify risk clusters for metabolic syndrome and its components:  
838 findings from the International Mobility in Aging Study." *BMJ Open* 8 (3): e018680.  
839 doi:10.1136/bmjopen-2017-018680.
- 840 Porio, Emma. 2014. "Climate Change Vulnerability and Adaptation in Metro Manila: Challenging  
841 Governance and Human Security Needs of Urban Poor Communities." *Asian Journal of Social*  
842 *Science* 42 (1-2): 75-102. doi:10.1163/15685314-04201006.
- 843 Porio, Emma. 2011. "Vulnerability, Adaptation, and Resilience to Floods and Climate Change-Related  
844 Risks among Marginal, Riverine Communities in Metro Manila." *Asian Journal of Social Science*  
845 39 (4): 425–445.
- 846 R Core Team. 2017. R: A language and environment for statistical computing. Vienna, Austria: R  
847 Foundation for Statistical Computing. <https://www.R-project.org/>.
- 848 Richter, Aaron N., and Taghi M. Khoshgoftaar. 2018. "A Review of Statistical and Machine Learning  
849 Methods for Modeling Cancer Risk using Structured Clinical Data." *Artificial Intelligence In*  
850 *Medicine* 90: 1-14. doi:10.1016/j.artmed.2018.06.002.
- 851 Ritchie, Scott A., Sharron Long, Alistair Hart, Cameron E. Webb, and Richard C. Russel. 2003. "AN  
852 ADULTICIDAL STICKY OVITRAP FOR SAMPLING CONTAINER-BREEDING MOSQUITOES." *Journal of*  
853 *the American Mosquito Control Association* 19 (3): 235-242.
- 854 Rydzanicz, Katarzyna, Zygmunt Kącki, and Piotr Jawień. 2011. "Environmental factors associated with the  
855 distribution of floodwater mosquito eggs in irrigated fields in Wrocław, Poland." *Journal of*  
856 *Vector Ecology* 36 (2): 332-342.
- 857 Ryo, Masahiro, and Matthias C. Rilling. 2017a. "Statistically reinforced machine learning for nonlinear  
858 patterns and variable interactions." *Ecosphere* 8 (11).
- 859 Ryo, Masahiro, Boyan Angelov, Stefano Mammola, Jamie KassBlas M. Benito, and Florian Hartig. 2020.  
860 "Explainable Artificial Intelligence enhances the ecological interpretability of black-box species  
861 distribution models." doi:<https://doi.org/10.32942/osf.io/w96pk>.
- 862 Ryo, Masahiro, Chihiro Yoshimura, and Yuichi Iwasaki. 2018. "Importance of antecedent environmental  
863 conditions in modeling species distributions." *Ecography* (41): 825–836.

- 864 Ryo, Masahiro, Eric Harvey, Christopher T. Robinson, and Florian Altermatt. 2017b. "Nonlinear higher  
865 order abiotic interactions explain riverine biodiversity." *Journal of Biogeography* 45 (3): 628–639.
- 866 Sallam, Mohamed F., Chelsea Fizer, Andrew N. Pilant, and Pai-Yei Whung. 2017. "Systematic Review:  
867 Land Cover, Meteorological, and Socioeconomic Determinants of Aedes Mosquito Habitat for  
868 Risk Mapping." *Int. J. Environ. Res. Public Health* 14 (10): 1230. doi:10.3390/ijerph14101230.
- 869 Sarfraz, Muhammad Shahzad, Nitin K Tripathi, Taravudh Tipdecho, Thawisak Thongbu, Pornsuk  
870 Kerdthong, and Marc Souris. 2012. "Analyzing the spatio-temporal relationship between dengue  
871 vector larval density and land-use using factor analysis and spatial ring mapping." *BMC public  
872 health* 12 (1): 853.
- 873 Scott, Thomas W., and Amy C. Morrison. 2010. "Longitudinal Field Studies Will Guide a Paradigm Shift in  
874 Dengue Prevention." *Vector Biology, Ecology and Control* 139-161.
- 875 Seidahmed, Osama M. E., Deng Lu, Chee Seng Chong, Lee Ching Ng, and Elfatih A. B. Eltahir. 2018.  
876 "Patterns of Urban Housing Shape Dengue Distribution in Singapore at Neighborhood and  
877 Country Scales." *GeoHealth* 2 (1): 54–67. doi:<https://doi.org/10.1002/2017GH000080>.
- 878 Shashua-Bar, Limor, David Pearlmutter, and Evyatar Erell. 2011. "The influence of trees and grass on  
879 outdoor thermal comfort in a hot-arid environment." *Int. J. Climatol* 31 (10): 1498–1506.
- 880 Sheela, A. M., A. Ghermandi, P. Vineetha, R. V. Sheeja, J. Justus, and K. Ajayakrishna. 2017. "Assessment  
881 of relation of land use characteristics with vector-borne diseases in tropical areas." *Land Use  
882 Policy* 63: 369-380.
- 883 Silver, John B. 2007. *Mosquito Ecology, Field Sampling Methods*. Third Edition. New York: Springer  
884 science & business media.
- 885 Souza, Raquel Lima, Vánio André Mugabe, Igor Adolfo D. Paploski, Moreno S. Rodrigues, Patrícia Sousa  
886 dos Santos Moreira, Leile Camila Jacob Nascimento, Christopher Michael Roundy, et al. 2017.  
887 "Effect of an intervention in storm drains to prevent Aedes aegypti reproduction in Salvador,  
888 Brazil." *Parasites & Vectors* 10 (1): 1-6.
- 889 Stanton, Jessica C., Richard G. Pearson, Ned Horning, and Resit Akçakaya. 2012. "Combining static and  
890 dynamic variables in species distribution models under climate change." *Methods in Ecology and  
891 Evolution* 3 (2): 349-357. doi:10.1111/j.2041-210X.2011.00157.x.
- 892 Su, Glenn L. Sia. 2008. "Correlation of Climatic Factors and Dengue Incidence in Metro Manila,  
893 Philippines." *AMBIO: A Journal of the Human Environment* 37 (4): 292-294. doi: 10.1579/0044-  
894 7447(2008)37[292:COCFAD]2.0.CO;2.
- 895 Suarez-Rubio, Marcela, and Renata Krenn. 2018. "Quantitative analysis of urbanization gradients: a  
896 comparative case study of two European cities." *Journal of Urban Ecology* 4 (1): juy027.
- 897 Thammapalo, S., V. Chongsuvivatwong, A. Geater, and M. Dueravee. 2007. "Environmental factors and  
898 incidence of dengue fever and dengue haemorrhagic fever in an urban area, Southern Thailand."  
899 *Epidemiol. Infect.* 136 (1): 135-143.

- 900 Thani, Sharifah Khalizah Syed Othman, Nik Hanita Nik Mohamad, and Sharifah Mastura Syed Abdullah.  
901 2017. "Influence of Urban Landscapes to Microclimatic Variances in a Tropical City." *Asian*  
902 *Journal of Behavioural Studies* 2 (7): 31-41.
- 903 Thi, Kim Lien Pham, Laurence Briant, Laurent Gavotte, Pierrick Labbe, and Marco Perriat-Sanguinet.  
904 2017. "Incidence of dengue and chikungunya viruses in mosquitoes and human patients in  
905 border provinces of Vietnam." *Parasites & Vectors* 10 (1): 556. doi:10.1186/s13071-017-2422-z.
- 906 Thongsripong, Panpim, Amy Green, Pattamaporn Kittayapong, Durrell Kapan, Bruce Wilcox, and  
907 Shannon Bennett. 2013. "Mosquito Vector Diversity across Habitats in Central Thailand Endemic  
908 for Dengue and Other Arthropod-Borne Diseases." *PLoS Negl Trop Dis* 7 (10): e2507.  
909 doi:10.1371/journal.pntd.0002507.
- 910 Tovar-Zamora, Ivonne, Javier Caraveo-Patiño, Rosa Patricia Penilla-Navarro, Vania Serrano-Pinto, Jorge  
911 Méndez-Galván, Alejandro Maeda Martínez, Israel Guerrero-Cárdenas, and Rosalía Servín-  
912 Villegas. 2019. "Seasonal Variation in Abundance of Dengue Vector in the Southern Part of the  
913 Baja California Peninsula, Mexico." *Southwestern Entomologist* 44 (4): 885-895.  
914 doi:10.3958/059.044.0404.
- 915 USGS. n.d. MOD11A2 v006. Accessed 7 26, 2019. <https://lpdaac.usgs.gov/products/mod11a2v006/>.
- 916 —. n.d. MOD13Q1 v006. Accessed 7 25, 2019. <https://lpdaac.usgs.gov/products/mod13q1v006/>.
- 917 Vanwambeke, Sophie O, Birgit HB van Benthem, Nardlada Khantikul, Chantal Burghoorn-Maas,  
918 Kamolwan Panart, Linda Oskam, Eric F Lambin, and Pradya Somboon. 2006. "Multi-level  
919 analyses of spatial and temporal determinants for dengue infection." *International Journal of*  
920 *Health Geographics* 5 (1): 5. doi:10.1186/1476-072X-5-5.
- 921 Vanwambeke, Sophie O., Eric F. Lambin, Markus P. Eichhorn, Stéphane P. Flasse, Ralph E. Harbach, Linda  
922 Oskam, Pradya Somboon, et al. 2007. "Impact of Land-use Change on Dengue and Malaria in  
923 Northern Thailand." *EcoHealth* 4 (1): 37-51.
- 924 Vanwambeke, Sophie O., Shannon N. Bennett, and Durrell D. Kapan. 2011. "Spatially disaggregated  
925 disease transmission risk: land cover, land use and risk of dengue transmission on the island of  
926 Oahu." *Tropical Medicine and International Health* 16 (2): 174–185. doi:10.1111/j.1365-  
927 3156.2010.02671.x.
- 928 Wickham, Hadley, and Winston Chang. 2019. "Package 'ggplot2', Create Elegant Data Visualisations  
929 Using the Grammar of Graphics." 8 11. <http://ggplot2.tidyverse.org>,  
930 <https://github.com/tidyverse/ggplot2>.
- 931 World Bank. 2014. Third Flood Risk Management and Urban Resilience Workshop. NW Washington,  
932 USA: The World Bank Group.
- 933 Wright, Marvin N., Stefan Wager, and Philipp Probst. 2020. "A Fast Implementation of Random Forests."  
934 1 10. <https://cran.r-project.org/web/packages/ranger/ranger.pdf>.
- 935 Yee, Susan Harrell, Donald A. Yee, Rebeca de Jesus Crespo, Autumn Oczkowski, Fengwei Bai, and  
936 Stephanie Friedman. 2019. "Linking Water Quality to *Aedes aegypti* and Zika in Flood-Prone  
937 Neighborhoods." *EcoHealth* 16 (2): 191–209.

938 Zeileis, Achim, Torsten Hothorn, and Kurt Hornik. 2008. "Model-Based Recursive Partitioning." *Journal of*  
939 *Computational and Graphical Statistics* 17 (2): 492-514. doi:10.1198/106186008X319331.

940 Zheng, Xueli, Daibin Zhong, Yulan He, and Guofa Zhou. 2019. "Seasonality modeling of the distribution of  
941 *Aedes albopictus* in China based on climatic and environmental suitability." *Infectious Diseases*  
942 *of Poverty* 8 (1): 1-9. doi:10.1186/s40249-019-0612-y.

943 Zoleta-Nantes, Doracie B. 200. "Flood Hazards in Metro Manila: Recognizing Commonalities, Differences,  
944 and Courses of Action." *Social Science Diliman* 1 (1): 60-105.

945

946

947
